# Supplementary material for: Increasing income-based inequality in suicide mortality among working-age women and men, Sweden, 1990–2007: is there a point of trend change?
Source: PubMed Central journal article supplement — J Epidemiol Community Health. 2018 Jul 18;72(11):1009–15. doi: 10.1136/jech-2018-210696 (PMC6227817; doi:10.1136/jech-2018-210696), 2018-07-18
Supplement: jech-2018-210696supp001.pdf [file jech-2018-210696supp001.pdf]

**Supplementary Material eTable 1 Age-standardised suicide mortality rates by income quintile among Swedish working-age population (30-64 years old)**

| Cohort    | Income quintile | Men        |                 |                                              |                     | Women      |                 |                                              |                     |  |  |
|-----------|-----------------|------------|-----------------|----------------------------------------------|---------------------|------------|-----------------|----------------------------------------------|---------------------|--|--|
|           |                 | Population | Mortality count | Age-standardised mortality rate <sup>a</sup> | 95% CI <sup>b</sup> | Population | Mortality count | Age-standardised mortality rate <sup>a</sup> | 95% CI <sup>b</sup> |  |  |
| 1990-1993 | Total           | 1 883 651  | 558             | 29.9                                         | 27.4 32.4           | 1 836 890  | 240             | 13.2                                         | 11.5 14.8           |  |  |
|           | Q1              | 376 601    | 180             | 48.5                                         | 41.3 55.8           | 365 773    | 50              | 14.0                                         | 10.0 17.9           |  |  |
|           | Q2              | 375 140    | 125             | 34.5                                         | 28.4 40.6           | 367 228    | 69              | 18.4                                         | 14.1 22.8           |  |  |
|           | Q3              | 377 854    | 90              | 24.3                                         | 19.2 29.4           | 367 080    | 46              | 13                                           | 9.2 16.8            |  |  |
|           | Q4              | 377 091    | 86              | 22.3                                         | 17.5 27.1           | 368 545    | 38              | 10.5                                         | 7.1 13.9            |  |  |
|           | Q5              | 376 965    | 77              | 19.5                                         | 14.9 24.0           | 368 264    | 37              | 9.8                                          | 6.5 13.1            |  |  |
| 1991-1994 | Total           | 1 904 072  | 515             | 27.1                                         | 24.7 29.4           | 1 854 850  | 198             | 10.7                                         | 9.2 12.2            |  |  |
|           | Q1              | 379 780    | 182             | 49.1                                         | 41.8 56.4           | 370 146    | 47              | 13.3                                         | 9.5 17.2            |  |  |
|           | Q2              | 380 575    | 114             | 30.6                                         | 25 36.3             | 370 679    | 39              | 10.5                                         | 7.2 13.9            |  |  |
|           | Q3              | 382 063    | 86              | 23.1                                         | 18.1 28.0           | 370 556    | 52              | 14.5                                         | 10.5 18.5           |  |  |
|           | Q4              | 380 799    | 74              | 19.8                                         | 15.2 24.3           | 371 716    | 37              | 10.7                                         | 7.1 14.2            |  |  |
|           | Q5              | 380 855    | 59              | 15.5                                         | 11.2 19.8           | 371 753    | 23              | 5.4                                          | 3.1 7.7             |  |  |
| 1992-1995 | Total           | 1 923 096  | 553             | 28.8                                         | 26.4 31.2           | 1 870 377  | 233             | 12.5                                         | 10.9 14.1           |  |  |
|           | Q1              | 384 007    | 192             | 50.7                                         | 43.4 58.0           | 373 420    | 59              | 16.2                                         | 11.9 20.4           |  |  |
|           | Q2              | 384 957    | 127             | 33.9                                         | 28.0 39.9           | 373 048    | 64              | 17.4                                         | 13.1 21.7           |  |  |
|           | Q3              | 384 383    | 83              | 21.7                                         | 17.0 26.5           | 374 814    | 36              | 9.4                                          | 6.3 12.5            |  |  |
|           | Q4              | 385 106    | 73              | 19.0                                         | 14.6 23.4           | 373 995    | 44              | 11.3                                         | 7.9 14.8            |  |  |
|           | Q5              | 384 643    | 78              | 19.2                                         | 14.7 23.7           | 375 100    | 30              | 7.9                                          | 5.0 10.9            |  |  |

| Cohort    | Income quintile | Men        |                 |                                              |                     |      | Women      |                 |                                              |                     |      |
|-----------|-----------------|------------|-----------------|----------------------------------------------|---------------------|------|------------|-----------------|----------------------------------------------|---------------------|------|
|           |                 | Population | Mortality count | Age-standardised mortality rate <sup>a</sup> | 95% CI <sup>b</sup> |      | Population | Mortality count | Age-standardised mortality rate <sup>a</sup> | 95% CI <sup>b</sup> |      |
| 1993-1996 | Total           | 1 946 686  | 500             | 25.8                                         | 23.5                | 28.0 | 1 891 315  | 211             | 11.1                                         | 9.6                 | 12.7 |
|           | Q1              | 388 422    | 164             | 43.4                                         | 36.6                | 50.1 | 377 906    | 50              | 13.9                                         | 10.0                | 17.8 |
|           | Q2              | 389 796    | 123             | 32.1                                         | 26.4                | 37.9 | 378 118    | 51              | 13.6                                         | 9.9                 | 17.4 |
|           | Q3              | 389 430    | 78              | 20.4                                         | 15.8                | 24.9 | 378 451    | 41              | 10.9                                         | 7.5                 | 14.3 |
|           | Q4              | 388 826    | 77              | 19.7                                         | 15.2                | 24.1 | 378 553    | 33              | 8.9                                          | 5.8                 | 12.0 |
|           | Q5              | 390 212    | 58              | 13.4                                         | 9.8                 | 17.1 | 378 287    | 36              | 10.4                                         | 6.8                 | 13.9 |
| 1994-1997 | Total           | 1 972 227  | 516             | 26.3                                         | 24.0                | 28.5 | 1 914 880  | 203             | 10.7                                         | 9.2                 | 12.1 |
|           | Q1              | 393 750    | 167             | 44.2                                         | 37.4                | 51.0 | 382 690    | 57              | 15.5                                         | 11.4                | 19.5 |
|           | Q2              | 393 931    | 145             | 37.7                                         | 31.5                | 43.9 | 383 084    | 47              | 12.8                                         | 9.1                 | 16.5 |
|           | Q3              | 395 356    | 90              | 23.2                                         | 18.4                | 28.0 | 382 458    | 27              | 7.1                                          | 4.4                 | 9.8  |
|           | Q4              | 394 633    | 63              | 15.9                                         | 12.0                | 19.9 | 382 823    | 44              | 11.5                                         | 8.0                 | 14.9 |
|           | Q5              | 394 557    | 51              | 12.3                                         | 8.8                 | 15.8 | 383 825    | 28              | 8.1                                          | 5.0                 | 11.2 |
| 1995-1998 | Total           | 1 986 804  | 527             | 26.7                                         | 24.4                | 29.0 | 1 930 198  | 189             | 9.8                                          | 8.4                 | 11.2 |
|           | Q1              | 396 883    | 184             | 47.6                                         | 40.6                | 54.6 | 385 218    | 47              | 11.7                                         | 8.2                 | 15.1 |
|           | Q2              | 396 650    | 129             | 33.8                                         | 27.9                | 39.7 | 384 992    | 43              | 11.2                                         | 7.8                 | 14.6 |
|           | Q3              | 397 891    | 89              | 22.9                                         | 18.1                | 27.7 | 386 316    | 38              | 9.7                                          | 6.6                 | 12.8 |
|           | Q4              | 397 347    | 67              | 17.0                                         | 12.9                | 21.1 | 387 398    | 29              | 7.7                                          | 4.8                 | 10.5 |
|           | Q5              | 398 033    | 58              | 13.6                                         | 9.8                 | 17.3 | 386 274    | 32              | 8.2                                          | 5.3                 | 11.0 |
| 1996-1999 | Total           | 1 997 460  | 490             | 24.6                                         | 22.4                | 26.7 | 1 940 194  | 204             | 10.5                                         | 9.0                 | 11.9 |
|           | Q1              | 399 439    | 188             | 47.9                                         | 41                  | 54.8 | 386 724    | 43              | 11.5                                         | 8.0                 | 15.0 |

| Cohort    | Income quintile | Men        |                 |                                              |                     | Women      |                 |                                              |                     |
|-----------|-----------------|------------|-----------------|----------------------------------------------|---------------------|------------|-----------------|----------------------------------------------|---------------------|
|           |                 | Population | Mortality count | Age-standardised mortality rate <sup>a</sup> | 95% CI <sup>b</sup> | Population | Mortality count | Age-standardised mortality rate <sup>a</sup> | 95% CI <sup>b</sup> |
|           | Q2              | 399 128    | 111             | 28.7                                         | 23.3 34.1           | 387 400    | 51              | 13.9                                         | 10.1 17.7           |
|           | Q3              | 398 329    | 83              | 21.2                                         | 16.7 25.8           | 388 615    | 45              | 11.6                                         | 8.2 15.0            |
|           | Q4              | 401 015    | 58              | 14.3                                         | 10.6 18.0           | 389 414    | 33              | 8.4                                          | 5.5 11.3            |
|           | Q5              | 399 549    | 50              | 11.3                                         | 8.1 14.5            | 388 041    | 32              | 8.5                                          | 5.4 11.6            |
| 1997-2000 | Total           | 2 008 500  | 436             | 21.7                                         | 19.7 23.7           | 1 952 129  | 184             | 9.4                                          | 8.0 10.8            |
|           | Q1              | 401 072    | 157             | 39.9                                         | 33.6 46.2           | 390 227    | 46              | 12.3                                         | 8.7 15.9            |
|           | Q2              | 401 527    | 86              | 21.6                                         | 17 26.3             | 389 124    | 53              | 14.1                                         | 10.3 17.9           |
|           | Q3              | 401 422    | 64              | 16.2                                         | 12.2 20.2           | 390 368    | 33              | 8.5                                          | 5.6 11.4            |
|           | Q4              | 402 636    | 73              | 18.1                                         | 13.9 22.2           | 391 809    | 28              | 7.4                                          | 4.6 10.2            |
|           | Q5              | 401 843    | 56              | 14.0                                         | 9.9 18.1            | 390 601    | 24              | 6.1                                          | 3.6 8.6             |
| 1998-2001 | Total           | 2 022 253  | 469             | 23.2                                         | 21.1 25.3           | 1 964 837  | 223             | 11.3                                         | 9.8 12.8            |
|           | Q1              | 403 565    | 165             | 41.3                                         | 34.9 47.6           | 392 130    | 61              | 16.0                                         | 11.9 20.1           |
|           | Q2              | 405 146    | 107             | 27.0                                         | 21.9 32.2           | 392 548    | 55              | 14.1                                         | 10.4 17.9           |
|           | Q3              | 403 173    | 82              | 20.6                                         | 16.1 25.0           | 392 795    | 51              | 13.3                                         | 9.6 16.9            |
|           | Q4              | 405 868    | 65              | 16.0                                         | 12.1 19.9           | 393 904    | 33              | 8.5                                          | 5.6 11.4            |
|           | Q5              | 404 501    | 50              | 11.8                                         | 8.4 15.2            | 393 460    | 23              | 5.4                                          | 3.2 7.6             |
| 1999-2002 | Total           | 2 033 105  | 500             | 24.5                                         | 22.4 26.7           | 1 976 057  | 181             | 9.1                                          | 7.8 10.4            |
|           | Q1              | 405 917    | 177             | 44.0                                         | 37.5 50.6           | 394 418    | 52              | 13.2                                         | 9.5 16.9            |
|           | Q2              | 407 176    | 127             | 31.7                                         | 26.2 37.3           | 394 044    | 45              | 11.3                                         | 8.0 14.6            |
|           | Q3              | 405 740    | 75              | 18.6                                         | 14.4 22.8           | 395 498    | 29              | 7.4                                          | 4.7 10.2            |

| Cohort    | Income quintile | Men        |                 |                                              |                     | Women |            |                 |                                              |                     |      |
|-----------|-----------------|------------|-----------------|----------------------------------------------|---------------------|-------|------------|-----------------|----------------------------------------------|---------------------|------|
|           |                 | Population | Mortality count | Age-standardised mortality rate <sup>a</sup> | 95% CI <sup>b</sup> |       | Population | Mortality count | Age-standardised mortality rate <sup>a</sup> | 95% CI <sup>b</sup> |      |
| 2000-2003 | Q4              | 407 014    | 65              | 15.7                                         | 11.8                | 19.5  | 396 270    | 19              | 4.9                                          | 2.7                 | 7.1  |
|           | Q5              | 407 258    | 56              | 13.2                                         | 9.6                 | 16.7  | 395 827    | 36              | 8.8                                          | 5.9                 | 11.7 |
|           | Total           | 2 042 689  | 446             | 21.8                                         | 19.7                | 23.8  | 1 985 536  | 176             | 8.8                                          | 7.5                 | 10.2 |
|           | Q1              | 407 774    | 175             | 44.0                                         | 37.5                | 50.6  | 396 406    | 58              | 14.1                                         | 10.3                | 17.9 |
|           | Q2              | 408 799    | 98              | 23.9                                         | 19.1                | 28.6  | 397 216    | 37              | 9.4                                          | 6.4                 | 12.5 |
|           | Q3              | 408 548    | 66              | 16.1                                         | 12.2                | 20.0  | 396 217    | 37              | 9.4                                          | 6.4                 | 12.5 |
|           | Q4              | 408 983    | 52              | 12.5                                         | 9.1                 | 15.8  | 398 501    | 24              | 6.4                                          | 3.8                 | 8.9  |
| 2001-2004 | Q5              | 408 585    | 55              | 13.0                                         | 9.5                 | 16.6  | 397 196    | 20              | 4.9                                          | 2.7                 | 7.1  |
|           | Total           | 2 050 955  | 473             | 23.0                                         | 20.9                | 25.0  | 1 993 991  | 174             | 8.6                                          | 7.3                 | 9.9  |
|           | Q1              | 409 498    | 169             | 42.2                                         | 35.8                | 48.6  | 397 944    | 48              | 12.6                                         | 8.9                 | 16.2 |
|           | Q2              | 409 508    | 116             | 28.9                                         | 23.6                | 34.2  | 399 592    | 43              | 10.2                                         | 7.1                 | 13.3 |
|           | Q3              | 411 174    | 89              | 21.8                                         | 17.3                | 26.3  | 398 583    | 28              | 7.0                                          | 4.4                 | 9.6  |
|           | Q4              | 410 229    | 59              | 14.3                                         | 10.6                | 17.9  | 399 044    | 27              | 6.5                                          | 4.0                 | 9.0  |
|           | Q5              | 410 546    | 40              | 8.8                                          | 5.9                 | 11.7  | 398 828    | 28              | 6.6                                          | 4.1                 | 9.1  |
| 2002-2005 | Total           | 2 048 096  | 473             | 23.1                                         | 21.0                | 25.2  | 1 992 640  | 216             | 10.8                                         | 9.3                 | 12.2 |
|           | Q1              | 409 185    | 146             | 36.4                                         | 30.4                | 42.3  | 398 488    | 76              | 20.4                                         | 15.6                | 25.2 |
|           | Q2              | 409 378    | 116             | 28.7                                         | 23.4                | 34.0  | 397 585    | 49              | 12.6                                         | 9.0                 | 16.2 |
|           | Q3              | 409 238    | 96              | 23.6                                         | 18.9                | 28.4  | 398 968    | 34              | 8.5                                          | 5.6                 | 11.4 |
|           | Q4              | 410 402    | 64              | 15.7                                         | 11.8                | 19.6  | 399 067    | 32              | 8.1                                          | 5.3                 | 11.0 |
|           | Q5              | 409 893    | 51              | 11.5                                         | 8.2                 | 14.7  | 398 532    | 25              | 6.1                                          | 3.6                 | 8.5  |

| Cohort    | Income quintile | Men        |                 |                                              |                     | Women      |                 |                                              |                     |
|-----------|-----------------|------------|-----------------|----------------------------------------------|---------------------|------------|-----------------|----------------------------------------------|---------------------|
|           |                 | Population | Mortality count | Age-standardised mortality rate <sup>a</sup> | 95% CI <sup>b</sup> | Population | Mortality count | Age-standardised mortality rate <sup>a</sup> | 95% CI <sup>b</sup> |
| 2003-2006 | Total           | 2 038 952  | 461             | 22.6                                         | 20.6 24.7           | 1 985 061  | 212             | 10.7                                         | 9.3 12.2            |
|           | Q1              | 407 441    | 187             | 46.8                                         | 40.1 53.6           | 396 992    | 77              | 20.6                                         | 15.8 25.3           |
|           | Q2              | 407 201    | 101             | 25.3                                         | 20.3 30.3           | 396 801    | 47              | 12.1                                         | 8.6 15.6            |
|           | Q3              | 408 235    | 69              | 17.0                                         | 12.9 21.0           | 397 239    | 32              | 7.8                                          | 5.1 10.6            |
|           | Q4              | 408 159    | 56              | 13.6                                         | 10.0 17.2           | 396 237    | 31              | 7.9                                          | 5.1 10.7            |
|           | Q5              | 407 916    | 48              | 11.2                                         | 7.9 14.5            | 397 792    | 25              | 6.4                                          | 3.7 9.1             |
| 2004-2007 | Total           | 2 022 279  | 449             | 22.3                                         | 20.2 24.4           | 1 970 943  | 184             | 9.1                                          | 7.8 10.5            |
|           | Q1              | 403 759    | 183             | 46.7                                         | 39.9 53.6           | 393 782    | 63              | 16.6                                         | 12.3 20.9           |
|           | Q2              | 405 003    | 100             | 25.6                                         | 20.5 30.6           | 393 914    | 47              | 11.7                                         | 8.3 15.1            |
|           | Q3              | 404 291    | 77              | 19.2                                         | 14.9 23.5           | 393 373    | 27              | 6.7                                          | 4.2 9.3             |
|           | Q4              | 404 470    | 53              | 12.8                                         | 9.3 16.3            | 395 217    | 27              | 6.8                                          | 4.2 9.5             |
|           | Q5              | 404 756    | 36              | 8.6                                          | 5.5 11.7            | 394 657    | 20              | 5.1                                          | 2.7 7.4             |

<sup>a</sup>: per 100,000 population

<sup>b</sup>: Confidence Intervals

**Supplementary Material eTable 2 Multiple disparity measures of age-standardised suicide mortality rates by income quintile: Swedish working-age population (30-64 years old), 1990-2004**

|                                 |      | 1990   | 1991   | 1992   | 1993   | 1994   | 1995   | 1996   | 1997   | 1998   | 1999   | 2000   | 2001   | 2002   | 2003   | 2004   | Trend  | p-values |
|---------------------------------|------|--------|--------|--------|--------|--------|--------|--------|--------|--------|--------|--------|--------|--------|--------|--------|--------|----------|
| <b>MEN</b>                      |      |        |        |        |        |        |        |        |        |        |        |        |        |        |        |        |        |          |
| <b><u>ABSOLUTE MEASURES</u></b> |      |        |        |        |        |        |        |        |        |        |        |        |        |        |        |        |        |          |
| Slope index of inequality       | Est. | 35.1   | 39.0   | 38.9   | 36.2   | 42.8   | 42.4   | 43.8   | 27.6   | 35.0   | 38.8   | 36.7   | 40.7   | 31.4   | 41.4   | 44.5   | 0.024  | 0.925    |
|                                 | SE   | 4.8    | 4.7    | 4.7    | 4.3    | 4.4    | 4.5    | 4.2    | 4.1    | 4.0    | 4.1    | 4.0    | 4.0    | 4.0    | 3.8    | 4.2    | 4.2    |          |
| Rate difference (income Q1-Q5)  | Est. | 29.0   | 33.6   | 31.5   | 30.0   | 31.9   | 34.0   | 36.6   | 25.9   | 29.5   | 30.8   | 31.0   | 33.4   | 24.9   | 35.6   | 38.1   | 0.061  | 0.742    |
|                                 | SE   | 16.7   | 16.5   | 16.7   | 15.0   | 15.1   | 15.6   | 14.8   | 14.7   | 13.9   | 14.4   | 14.4   | 13.9   | 13.2   | 14.9   | 14.8   |        |          |
| Rate difference (Q2-Q5)         | Est. | 15.0   | 15.1   | 14.7   | 18.7   | 25.4   | 20.2   | 17.4   | 7.6    | 15.2   | 18.5   | 10.9   | 20.1   | 17.2   | 14.1   | 17.0   | -0.114 | 0.608    |
|                                 | SE   | 14.8   | 14.0   | 14.5   | 13.3   | 14.1   | 13.6   | 12.1   | 12.3   | 11.9   | 12.8   | 11.5   | 11.9   | 12.3   | 11.6   | 11.7   |        |          |
| Range difference                | Est. | 29.0   | 33.6   | 31.7   | 30.0   | 31.9   | 34.0   | 36.6   | 25.9   | 29.5   | 30.8   | 31.5   | 33.4   | 24.9   | 35.6   | 38.1   | 0.067  | 0.724    |
|                                 | SE   | 4.4    | 4.3    | 4.3    | 3.9    | 3.9    | 4.1    | 3.8    | 3.8    | 3.6    | 3.8    | 3.7    | 3.6    | 3.4    | 3.9    | 3.8    |        |          |
| Between-group variance          | Est. | 112.9  | 139.5  | 148.7  | 113.8  | 152.6  | 153.3  | 170.9  | 86.6   | 106.0  | 134.3  | 138.6  | 136.3  | 79.6   | 166.9  | 178.5  | -0.753 | 0.659    |
|                                 | SE   | 31.6   | 35.0   | 36.0   | 28.0   | 31.8   | 34.0   | 35.2   | 24.8   | 25.6   | 29.5   | 31.1   | 28.3   | 20.0   | 35.8   | 36.1   |        |          |
| Absolute concentration index    | Est. | 5.6    | 6.2    | 6.2    | 5.8    | 6.8    | 6.8    | 7.0    | 4.4    | 5.6    | 6.2    | 5.9    | 6.5    | 5.0    | 6.6    | 7.1    | 0.004  | 0.925    |
|                                 | SE   | 0.8    | 0.7    | 0.8    | 0.7    | 0.7    | 0.7    | 0.7    | 0.7    | 0.6    | 0.7    | 0.6    | 0.6    | 0.6    | 0.7    | 0.7    |        |          |
| <b><u>RELATIVE MEASURES</u></b> |      |        |        |        |        |        |        |        |        |        |        |        |        |        |        |        |        |          |
| Relative index of inequality    | Est. | 1.18   | 1.41   | 1.35   | 1.40   | 1.61   | 1.57   | 1.78   | 1.26   | 1.50   | 1.57   | 1.68   | 1.75   | 1.36   | 1.82   | 1.97   | 0.030  | 0.002    |
|                                 | SE   | 0.15   | 0.16   | 0.15   | 0.15   | 0.15   | 0.15   | 0.15   | 0.18   | 0.16   | 0.15   | 0.17   | 0.15   | 0.15   | 0.16   | 0.16   |        |          |
| Rate ratio (income Q1/Q5)       | Est. | 2.49   | 3.17   | 2.64   | 3.24   | 3.59   | 3.50   | 4.24   | 2.85   | 3.50   | 3.33   | 3.39   | 4.80   | 3.17   | 4.18   | 5.43   | 0.091  | 0.001    |
|                                 | SE   | 1.36   | 1.99   | 1.44   | 2.05   | 2.34   | 2.17   | 2.64   | 1.90   | 2.24   | 2.02   | 2.08   | 3.53   | 2.10   | 2.77   | 4.29   |        |          |
| Rate ratio (income Q2/Q5)       | Est. | 1.77   | 1.97   | 1.77   | 2.40   | 3.07   | 2.49   | 2.54   | 1.54   | 2.29   | 2.40   | 1.84   | 3.28   | 2.50   | 2.26   | 2.98   | 0.040  | 0.066    |
|                                 | SE   | 1.02   | 1.32   | 1.02   | 1.58   | 2.03   | 1.61   | 1.69   | 1.13   | 1.55   | 1.52   | 1.23   | 2.51   | 1.71   | 1.61   | 2.49   |        |          |
| Range ratio                     | Est. | 2.49   | 3.17   | 2.67   | 3.24   | 3.59   | 3.50   | 4.24   | 2.85   | 3.50   | 3.33   | 3.52   | 4.80   | 3.17   | 4.18   | 5.43   | 0.093  | <0.001   |
|                                 | SE   | 0.35   | 0.51   | 0.37   | 0.52   | 0.60   | 0.56   | 0.68   | 0.48   | 0.57   | 0.52   | 0.55   | 0.90   | 0.54   | 0.71   | 1.09   |        |          |
| Index of disparity              | Est. | 66.2   | 97.7   | 65.1   | 115.7  | 145.9  | 123.0  | 148.0  | 71.1   | 122.2  | 108.3  | 94.0   | 204.5  | 127.0  | 129.2  | 203.2  | 4.675  | 0.004    |
|                                 | SE   | 21.0   | 29.6   | 20.6   | 32.3   | 37.8   | 32.8   | 37.0   | 27.1   | 33.8   | 30.1   | 28.1   | 54.0   | 35.3   | 36.6   | 58.4   |        |          |
| Mean log deviation              | Est. | 0.0576 | 0.0822 | 0.0786 | 0.0842 | 0.1154 | 0.1036 | 0.1331 | 0.0734 | 0.0936 | 0.1049 | 0.1209 | 0.1395 | 0.0816 | 0.1387 | 0.1685 | 0.004  | 0.002    |
|                                 | SE   | 0.0145 | 0.0188 | 0.0170 | 0.0193 | 0.0227 | 0.0210 | 0.0239 | 0.0187 | 0.0206 | 0.0208 | 0.0232 | 0.0272 | 0.0200 | 0.0254 | 0.0309 |        |          |
| Theil index                     | Est. | 0.0596 | 0.0847 | 0.0821 | 0.0830 | 0.1084 | 0.1017 | 0.1317 | 0.0795 | 0.0929 | 0.1051 | 0.1282 | 0.1275 | 0.0760 | 0.1441 | 0.1635 | 0.004  | 0.004    |
|                                 | SE   | 0.0150 | 0.0188 | 0.0176 | 0.0182 | 0.0198 | 0.0196 | 0.0225 | 0.0203 | 0.0196 | 0.0201 | 0.0242 | 0.0224 | 0.0173 | 0.0255 | 0.0272 |        |          |
| Relative concentration index    | Est. | 0.1883 | 0.2258 | 0.2156 | 0.2245 | 0.2569 | 0.2515 | 0.2841 | 0.2013 | 0.2399 | 0.2519 | 0.2680 | 0.2807 | 0.2168 | 0.2911 | 0.3153 | 0.005  | 0.002    |
|                                 | SE   | 0.0241 | 0.0253 | 0.0245 | 0.0248 | 0.0232 | 0.0238 | 0.0236 | 0.0289 | 0.0249 | 0.0241 | 0.0266 | 0.0240 | 0.0245 | 0.0258 | 0.0254 |        |          |

|                                |      | 1990   | 1991   | 1992   | 1993   | 1994   | 1995   | 1996   | 1997   | 1998   | 1999   | 2000   | 2001   | 2002   | 2003   | 2004   | Trend            | p-values         |
|--------------------------------|------|--------|--------|--------|--------|--------|--------|--------|--------|--------|--------|--------|--------|--------|--------|--------|------------------|------------------|
| <b>WOMEN</b>                   |      |        |        |        |        |        |        |        |        |        |        |        |        |        |        |        |                  |                  |
| <b>ABSOLUTE MEASURES</b>       |      |        |        |        |        |        |        |        |        |        |        |        |        |        |        |        |                  |                  |
| Slope index of inequality      | Est. | 8.2    | 7.8    | 11.3   | 5.8    | 8.1    | 5.2    | 5.8    | 9.5    | 13.4   | 7.6    | 10.7   | 7.8    | 16.5   | 16.3   | 13.9   | 0.512            | 0.005            |
|                                | SE   | 3.0    | 2.6    | 3.0    | 3.0    | 2.9    | 2.6    | 2.7    | 2.5    | 2.7    | 2.6    | 2.4    | 2.5    | 3.0    | 3.0    | 2.7    |                  |                  |
| Rate difference (income Q1-Q5) | Est. | 4.2    | 7.9    | 8.3    | 3.5    | 7.4    | 3.5    | 3.0    | 6.2    | 10.6   | 4.4    | 9.2    | 6.0    | 14.3   | 14.2   | 11.5   | 0.474            | 0.008            |
|                                | SE   | 10.1   | 9.0    | 10.2   | 10.3   | 10.1   | 9.0    | 9.3    | 8.5    | 9.1    | 9.3    | 8.4    | 8.8    | 10.5   | 10.7   | 9.6    |                  |                  |
| Rate difference (Q2-Q5)        | Est. | 8.6    | 5.1    | 9.5    | 3.2    | 4.7    | 3.0    | 5.4    | 8.0    | 8.7    | 2.5    | 4.5    | 3.6    | 6.5    | 5.7    | 6.6    | -0.057           | 0.575            |
|                                | SE   | 10.7   | 8.0    | 10.2   | 10.1   | 9.5    | 8.7    | 9.8    | 8.8    | 8.4    | 8.7    | 7.5    | 7.9    | 8.5    | 8.8    | 8.0    |                  |                  |
| Range difference               | Est. | 8.6    | 9.1    | 9.5    | 5.0    | 8.4    | 4.0    | 5.5    | 8.0    | 10.6   | 8.3    | 9.2    | 6.1    | 14.3   | 14.2   | 11.5   | 0.328            | 0.035            |
|                                | SE   | 2.8    | 2.3    | 2.7    | 2.6    | 2.5    | 2.3    | 2.5    | 2.3    | 2.4    | 2.2    | 2.2    | 2.3    | 2.7    | 2.8    | 2.5    |                  |                  |
| Between-group variance         | Est. | 9.3    | 9.8    | 14.0   | 3.7    | 9.5    | 2.5    | 4.4    | 9.2    | 15.3   | 8.5    | 9.9    | 5.9    | 25.9   | 26.9   | 17.9   | 0.563            | 0.116            |
|                                | SE   | 5.9    | 4.7    | 6.8    | 3.6    | 5.3    | 2.8    | 3.7    | 4.8    | 5.8    | 4.3    | 4.8    | 3.9    | 9.8    | 10.1   | 7.3    |                  |                  |
| Absolute concentration index   | Est. | 1.3    | 1.2    | 1.8    | 0.9    | 1.3    | 0.8    | 0.9    | 1.5    | 2.1    | 1.2    | 1.7    | 1.3    | 2.6    | 2.6    | 2.2    | 0.082            | 0.005            |
|                                | SE   | 0.5    | 0.4    | 0.5    | 0.5    | 0.5    | 0.4    | 0.4    | 0.4    | 0.4    | 0.4    | 0.4    | 0.4    | 0.5    | 0.5    | 0.4    |                  |                  |
| <b>RELATIVE MEASURES</b>       |      |        |        |        |        |        |        |        |        |        |        |        |        |        |        |        |                  |                  |
| Relative index of inequality   | Est. | 0.62   | 0.72   | 0.91   | 0.51   | 0.73   | 0.54   | 0.53   | 0.99   | 1.17   | 0.83   | 1.21   | 0.91   | 1.49   | 1.49   | 1.49   | -0.023 (slope 1) | 0.613 (slope 1)  |
|                                | SE   | 0.22   | 0.24   | 0.23   | 0.26   | 0.26   | 0.27   | 0.25   | 0.25   | 0.22   | 0.28   | 0.26   | 0.28   | 0.25   | 0.25   | 0.26   | 0.102 (slope 2)  | <0.001 (slope 2) |
| Rate ratio (income Q1/Q5)      | Est. | 1.43   | 2.46   | 2.05   | 1.34   | 1.91   | 1.43   | 1.35   | 2.02   | 2.96   | 1.50   | 2.88   | 1.91   | 3.34   | 3.22   | 3.26   | 0.080            | 0.013            |
|                                | SE   | 1.27   | 2.66   | 1.90   | 1.19   | 1.83   | 1.36   | 1.32   | 2.09   | 2.86   | 1.33   | 3.02   | 1.89   | 3.25   | 3.19   | 3.54   |                  |                  |
| Rate ratio (income Q2/Q5)      | Est. | 1.88   | 1.94   | 2.20   | 1.31   | 1.58   | 1.37   | 1.64   | 2.31   | 2.61   | 1.28   | 1.92   | 1.55   | 2.07   | 1.89   | 2.29   | 0.013            | 0.516            |
|                                | SE   | 1.56   | 2.16   | 2.00   | 1.15   | 1.56   | 1.29   | 1.54   | 2.33   | 2.54   | 1.16   | 2.18   | 1.56   | 2.12   | 2.01   | 2.56   |                  |                  |
| Range ratio                    | Est. | 1.88   | 2.69   | 2.20   | 1.56   | 2.18   | 1.52   | 1.65   | 2.31   | 2.96   | 2.69   | 2.88   | 1.94   | 3.34   | 3.22   | 3.25   | 0.079            | 0.017            |
|                                | SE   | 0.40   | 0.70   | 0.50   | 0.36   | 0.52   | 0.38   | 0.38   | 0.58   | 0.72   | 0.72   | 0.75   | 0.49   | 0.81   | 0.80   | 0.88   |                  |                  |
| Index of disparity             | Est. | 42.6   | 126.9  | 71.8   | 37.1   | 68.7   | 32.5   | 35.4   | 73.4   | 140.3  | 107.7  | 100.5  | 40.0   | 103.3  | 89.1   | 104.9  | 2.677            | 0.137            |
|                                | SE   | 26.7   | 53.3   | 34.9   | 26.8   | 35.7   | 28.0   | 26.4   | 39.4   | 51.9   | 49.5   | 47.9   | 30.4   | 45.9   | 43.7   | 50.9   |                  |                  |
| Mean log deviation             | Est. | 0.0257 | 0.0530 | 0.0462 | 0.0141 | 0.0410 | 0.0135 | 0.0190 | 0.0489 | 0.0723 | 0.0564 | 0.0647 | 0.0372 | 0.0927 | 0.0951 | 0.0951 | -0.004 (slope 1) | 0.340 (slope 1)  |
|                                | SE   | 0.0147 | 0.0252 | 0.0210 | 0.0119 | 0.0213 | 0.0126 | 0.0143 | 0.0237 | 0.0268 | 0.0265 | 0.0282 | 0.0214 | 0.0307 | 0.0311 | 0.0341 | 0.008 (slope 2)  | 0.002 (slope 2)  |
| Theil index                    | Est. | 0.0261 | 0.0460 | 0.0452 | 0.0139 | 0.0396 | 0.0134 | 0.0188 | 0.0483 | 0.0636 | 0.0526 | 0.0629 | 0.0383 | 0.0959 | 0.1007 | 0.0962 | -0.004 (slope 1) | 0.275 (slope 1)  |
|                                | SE   | 0.0149 | 0.0199 | 0.0199 | 0.0116 | 0.0199 | 0.0123 | 0.0140 | 0.0228 | 0.0216 | 0.0234 | 0.0264 | 0.0221 | 0.0312 | 0.0325 | 0.0335 | 0.009 (slope 2)  | <0.001 (slope 2) |
| Relative concentration index   | Est. | 0.0994 | 0.1149 | 0.1460 | 0.0811 | 0.1171 | 0.0866 | 0.0855 | 0.1579 | 0.1872 | 0.1332 | 0.1937 | 0.1463 | 0.2377 | 0.2380 | 0.2380 | -0.004 (slope 1) | 0.613 (slope 1)  |
|                                | SE   | 0.0357 | 0.0378 | 0.0374 | 0.0409 | 0.0422 | 0.0425 | 0.0398 | 0.0401 | 0.0345 | 0.0447 | 0.0413 | 0.0452 | 0.0392 | 0.0405 | 0.0423 | 0.016 (slope 2)  | <0.001 (slope 2) |

Est., estimation; SE, standard error. See HD\*Calc website for the interpretations of these measures: <http://seer.cancer.gov/hdcalc/measures.html>.

Values in trend and p-value columns were obtained from the joinpoint analysis, and (slope 1) and (slope 2) indicate the first and the second segments of slopes. Trends for the mean log deviation, the Theil index, the relative concentration index and the relative index of inequality in women changed at 1995.
